# Supplementary material for: Multipath routing based on a network coding protocol suit
Source: Research Square preprint supplement (doi:10.21203/rs.3.rs-5496340/v1), 2025-03-21
Supplement: Supplementary file 2 [file b119753d514ceb4f83b89740.pdf]

## 1 Methods

### 3 The multipath search algorithm

4 The major goal of the search algorithm is to construct a directed acyclic (DA) graph between  
5 the source router  $s$  and the destination  $d$  in a distributed manner, given a network. The topology  
6 information of the network can be acquired via the corresponding functions of existing routing  
7 protocols, such as open shortest path first (OSPF), routing information protocol (RIP) and  
8 intermediate system-to-intermediate system (IS-IS). Each node executes the same algorithm to  
9 build up its routing table.

10 In the search algorithm, the source  $s$  is the first router to process. In principle, for a node  $v$ ,  
11 whether an entry is added to the routing table depends on whether it has been confirmed that one  
12 of the direct neighbors is connected forward to the destination  $d$  or is node  $d$  exactly. If yes, then  
13 node  $v$  is also connected forward to node  $d$  and two new routing entries are added to the tables of  
14 it and the neighbor, respectively. Unlike general search ideas, where the search process exits once  
15 the destination is reached, this algorithm continues to search for other nodes that are also connected  
16 forward to the destination node  $d$  to obtain new transmission paths, according to the breadth-first  
17 strategy. Note, here the search process cannot return back to deal with the previous node until all  
18 the direct neighbors have been checked up. For example, as shown in Fig. 1b, if neighbor  $v_{i+1}$  has  
19 been confirmed to be connected to the destination  $d$ , i.e., a packet sent by  $v_{i+1}$  can reach node  $d$   
20 forward, then two entries are added to the routing tables of  $v_i$  and  $v_{i+1}$ , respectively. On the other  
21 hand, since other neighbors  $v_{i+2}$  and  $v_{i+3}$  are also connected forward to node  $d$ , they also can act  
22 as the next hops of  $v_i$  to the destination.

23 Give a node  $v$ , the processing algorithm can be divided into two subfunctions for convenience:  
24 one is to process the direct neighbors of  $v$  that are connected forward to the destination, and the  
25 other is to process the neighbors that are not connected to the destination or it is not confirmed  
26 whether they are connected to the destination (they are added to the queue  $L_1$  or  $L_2$ ). If the edge  
27 between node  $v$  and a direct neighbor  $n$  has not been visited yet and the minimum hop number  
28 from the source  $s$  to  $v$  is less than or equal to the minimum hop number to neighbor  $n$ , then both  
29 routing tables of node  $v$  and  $n$  should be updated, provided that it is confirmed that node  $n$  is  
30 connected forward to the destination. This subfunction is shown in Extended Data Fig. 1 (Function  
31  $F_1$ ), where  $A$  is the adjacency matrix of a network,  $A_0$  is a matrix with the same size as  $A$ ,  
32 containing the state information whether a directed edge has been visited,  $M_0$  is a vector containing  
33 the minimum hop numbers from the source  $s$  to other nodes, and queues  $L_1$  and  $L_2$ , indexed by  
34 node  $v$ , are used to temporarily contain the direct neighbors of  $v$  to be processed in later steps.

35 Clearly, as shown in Extended Data Fig. 1, if it is not confirmed whether neighbor  $n$  is  
36 connected to the destination  $d$  or not, then which queue ( $L_1$  or  $L_2$ ) the node will be added to  
37 depends on the minimum hop numbers from the source  $s$  to it and node  $v$ . To clarify the  
38 difference, two cases are shown in Extended Data Fig. 3, where the black solid lines are the links  
39 that have not been visited while the blue ones represent the links that have been visited (the blue  
40 arrow refers to the directed edge that not only has been visited but has been selected out to form  
41 the DA graph, which means two routing entries also have been added to the routing tables of both  
42 sides, respectively), and the red dashed arrow represents a directed edge that the neighbor's  
43 minimum hop number is less than that of node  $v$  (it is possible to form routing loops).

44 As shown in Extended Data Fig. 3a, node  $v_3$  is a direct neighbor of  $v_1$  and its minimum hop  
45 number from the source node  $s$  is larger than the number of  $v_1$ . Since at that time node  $v_3$  has not

been visited (only the edge between them has been visited), it is impossible to know whether node  $v_3$  is connected forward to node  $d$  or not. Thus, node  $v_3$  is added to the end of queue  $L_1$  of node  $v_1$ . Similarly, the neighbor  $v_4$  is also added to queue  $L_1$ . On the other hand, as shown in Extended Data Fig. 3b, since node  $v_3$  is visited prior to node  $v_2$  according to the depth-first strategy and the minimum hop number of node  $v_3$  is larger than that of node  $v_2$ ,  $v_2$  is added to queue  $L_2$  of node  $v_3$ .

Next, the nodes in  $L_1$  of node  $v$  will be processed first because they have larger hop numbers from the source  $s$ , which is in accord with the principle of DA graphs. The subfunction is given in Extended Data Fig. 2 (Function  $F_2$ ), where vector  $B_0$  contains the state whether a node has been checked (for example, 1 means *yes* while 0 represents *no*). Clearly, for a neighbor  $n$  in  $L_1$ , if it has not been visited yet, then the state in  $B_0$  is modified and Function  $F_1$  is called first to process its direct neighbors, using the depth-first search idea. If it is confirmed that neighbor  $n$  is connected forward to  $d$ , then the routing tables of node  $v$  and  $n$  will be updated. Note, the second loop (line 11 to 15) is used to restore the states because the nodes may be useful in the later steps though they are not connected to  $d$  forward. For example, as shown in Extended Data Fig. 3a, though node  $v_4$  is not connected forward to the destination  $d$ , it can be connected to node  $d$  reversely via node  $v_1$ , which allows more nodes to relay packets to the destination.

Only if it is confirmed that node  $v$  cannot be connected forward to node  $d$  after all the neighbors in  $L_1$  have been checked up, then the nodes in  $L_2$  will be processed by Function  $F_2$ . For example, as shown in Extended Data Fig. 3b, since the current node is  $v_3$  and the destination  $d$  is exactly a direct neighbor of it, Function  $F_2$  is not called, namely line 20 of Function  $F_1$  is not executed to process the node  $v_2$  in  $L_2$ , indexed by node  $v_3$ , which means the search algorithm will return back to process the other neighbor node in queue  $L_1$  of node  $v_1$ , i.e., node  $v_4$ .

## Implementation of the search algorithm

An example of the search algorithm is shown in Extended Data Fig. 4, where the black lines are the edges that have not been visited while the blue ones represent the links that have been visited, and the blue arrows refer to the edges that not only have been visited but have been selected out to form a directed acyclic graph between the source router  $s$  and the destination  $d$ , i.e., two entries have been added in the routing tables of both sides of the directed edge, respectively. Each node of the network, denoted by  $v$  for convenience, executes Function  $F_1$ , in which the source router  $s$  is the first node to process.

Clearly, node  $s$  has two direct neighbors  $v_1$  and  $v_2$ . Since both of them have not been visited yet, node  $s$  does not know whether they can be connected forward to  $d$  and has to add them to queue  $L_1$ , indexed by node  $s$ , which is shown in Extended Data Fig. 4a.

Without loss of generality, assume node  $v_1$  (in queue  $L_1$  of node  $s$ ) is first checked by Function  $F_2$ . Since node  $v_1$  has not been visited, node  $s$  jumps to call Function  $F_1$  via line 4 of Function  $F_2$ . Since the destination  $d$  is a direct neighbor of  $v_1$ , so the directed edge from node  $v_1$  to  $d$  is redrawn as a blue arrow line, which means that  $v_1$  is connected forward to  $d$  and two entries are added to the routing tables of them, respectively. On the other hand, node  $v_2$  is also a direct neighbor of  $v_1$  while both of them have the same minimum hop number from the source, so it is added to queue  $L_1$ , indexed by  $v_1$ . This is shown in Extended Data Fig. 4b.

The next step is to check the nodes in queue  $L_1$ , indexed by  $v_1$ . Obviously, as shown in Extended Data Fig. 4c, node  $v_2$  is the only one to be processed by Function  $F_2$ . Since the destination  $d$  is also a direct neighbor of  $v_2$ , the directed edge from  $v_2$  to  $d$  is re-drawn as a blue arrow line, which

means node  $v_2$  is also connected forward to  $d$  and two entries will be added to the routing tables of them, respectively.

Note, for node  $v_2$ , after its direct neighbor  $d$  having been checked by Function  $F_2$ , node  $v$  returns back to continue to execute line 6 of Function  $F_2$  (it is executed for the first time). Thus, the directed edge from node  $v_1$  to  $v_2$  is re-drawn as a blue arrow line, i.e., two entries are added to the routing tables of them, respectively, which is shown in Extended Data Fig. 4d. Similar operations are performed to re-draw the directed edge from  $s$  to  $v_1$ , as shown in Extended Data Fig. 4e.

For the source node  $s$ , since the other neighbor  $v_2$  in queue  $L_1$  is connected forward to  $d$ , similar operations are performed to re-draw the directed edge from it to  $v_2$ , which is shown in Extended Data Fig. 4f.

Finally, a DA graph is constructed from the source  $s$  to node  $d$  by interconnecting all the selected nodes along the directed edges between them. This is similar to the generation procedure of a SPF tree by the shortest path algorithm.

### The setting process of encoding matrices

The procedure is started up by the destination  $d$ . After receiving a request from the source router  $s$ , it first generates a  $|In(d)| \times |In(d)|$  random square matrix  $\mathbf{R}$  with full rank, and then sends each row vector of  $\mathbf{R}$  over an incoming edge  $e_i \in In(d)$  reversely to the source  $s$ , where  $In(d)$  refers to the incoming edge set of  $d$ .

At an intermediate node  $v$ ,  $|Out(v)|$  row vectors can be received from the outgoing edges and given as a  $|Out(v)| \times |In(d)|$  matrix, denoted by  $\mathbf{Y}'_v$  for convenience, where  $Out(v)$  is the outgoing edge set of  $v$ . Pre-multiplying this matrix by the local encoding matrix (kernel), we can obtain a new matrix

$$\mathbf{X}'_v = \mathbf{K}_v \cdot \mathbf{Y}'_v$$

where  $\mathbf{K}_v$  is a  $|In(v)| \times |Out(v)|$  random matrix (the rank  $r(\mathbf{K}_v) = \text{Min}(|In(v)|, |Out(v)|)$ ), generated by node  $v$  itself. Similarly, each row vector of  $\mathbf{X}'_v$  is sent over an incoming edge  $e_i \in In(v)$  reversely to the source.

This procedure is performed until the source node  $s$ , where the received matrix is denoted by  $\mathbf{Y}'_s$  for convenience and the row number is  $|Out(s)|$ . Note, linear row transformation is employed at each intermediate node in the above procedure, namely each row vector of  $\mathbf{Y}'_s$  is a linear combination of the row vectors of matrix  $\mathbf{R}$ , according to the theory of linear algebra. Thus, the maximum dimension  $\omega$  of the source messages (the number of edge-disjoint paths from the source  $s$  to the destination  $d$ ) is equal to the row rank of  $\mathbf{Y}'_s$ , which means  $\omega$  independent column vectors<sup>5</sup> can also be extracted from  $\mathbf{Y}'_s$  because linear column transformation will be employed in the data transmission phase. The local encoding matrix  $\mathbf{K}_s$  of the source node  $s$  can be obtained by calculating the generalized inverse of a matrix consisting of  $\omega$  independent column vectors from  $\mathbf{Y}'_s$ , and for node  $d$ , the corresponding column vectors with the same order information as the selected independent column vectors of  $\mathbf{Y}'_s$  can be extracted from  $\mathbf{R}$  to form its local encoding matrix  $\mathbf{K}_d$ , which is used to decode the received packets in the data transmission phase.

**Competing interests** The authors declare no competing interests.

---

**Function  $F_1$ :** Processing algorithm of a node  $v$

---

**Input:** the source node  $s$ , the destination  $d$ , a node  $v$ ;

**Output:**  $L_1$ ,  $L_2$ , new routing entries;

**Data:** adjacency matrix  $A$ , state matrix  $A_0$ , state vector  $M_0$ ;

```

1 for all neighbors  $n$  of node  $v$  do
2   if  $A_0[v][n] == 0$  then
3     if  $M_0[n] \geq M_0[v]$  then
4       if node  $n$  is connected to  $d$  then
5         A new entry is added to the routing table of  $v$ (src =  $s$ , dst =  $d$ , next =  $n$ );
6         A new entry is added to the routing table of  $n$ (src =  $d$ , dst =  $s$ , next =  $v$ );
7       else
8         node  $n$  is added to the end of  $L_1$ ;
9       end
10     else
11       node  $n$  is added to the end of  $L_2$ ;
12     end
13      $A_0[v][n] = 1$ ;
14   end
15 end
16 if  $L_1$  is not empty then
17   Call  $F_2(s, d, v, L_1)$ ;
18 end
19 if  $v$  is not connected  $d$  and  $L_2$  is not empty then
20   Call  $F_2(s, d, v, L_2)$ ;
21 end

```

---

**Extended Data Fig. 1. Processing algorithm of a router node  $v$ .**

---

**Function  $F_2$ :** Processing algorithm of queue  $L_i$  of  $v$

---

**Input:** node  $s, d$ , current node  $v$ , queue  $L_i (i = 1, 2)$ ;

**Output:** new routing entries;

**Data:** state vector  $B_0$

```

1 for all nodes  $n$  in  $L_i$  do
2     if  $B_0[n] == 0$  then
3          $B_0[n] = 1$ ;
4         Call  $F_1(s, d, n)$ ; //depth-first search
5     end
6     if node  $n$  is connected to  $d$  then
7         A new entry is added to the routing table of  $v$ (src =  $s$ , dst =  $d$ , next =  $n$ );
8         A new entry is added to the routing table of  $n$ (src =  $d$ , dst =  $s$ , next =  $v$ );
9     end
10 end
11 for all nodes  $n$  in  $L_i$  do
12     if node  $n$  is not connected to  $d$  then
13          $B_0[n] = 0$ ;
14     end
15 end

```

---

**Extended Data Fig. 2.** Processing algorithm of neighbors in queue  $L_1$  (or  $L_2$ ) of node  $v$ .

146

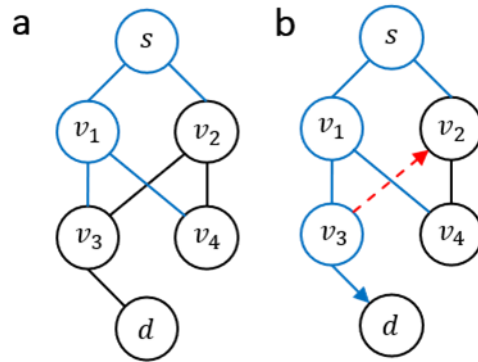

147

148 **Extended Data Fig. 3. Two cases of the search algorithm.** **a**, Nodes  $v_3$  and  $v_4$  are added to the  
 149 end of queue  $L_1$  of node  $v_1$ , because their minimum hop numbers from the source node are  
 150 larger than the hop number of  $v_1$ . **b**, Node  $v_2$  is added to queue  $L_2$  of node  $v_3$ , because the  
 151 minimum hop number of node  $v_3$  is larger than that of  $v_2$ .

152

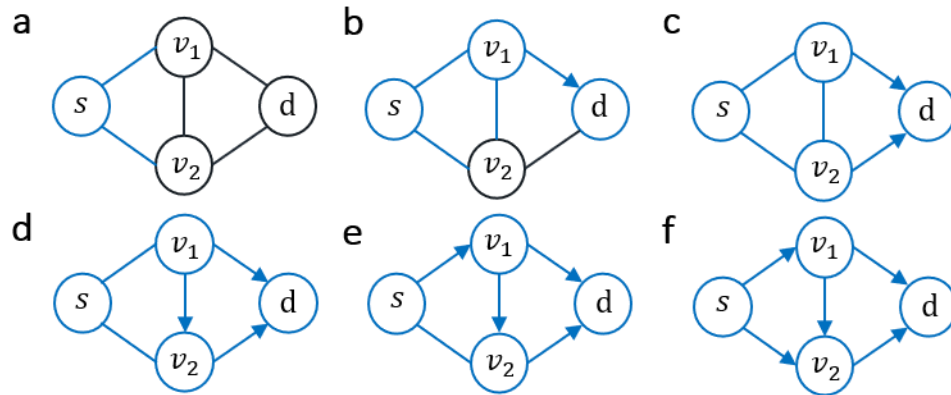

153

154 **Extended Data Fig. 4. An example of the search algorithm.** According to the sequence of  
 155 time, **a** to **f** correspond to the six steps of the search algorithm.
